## **Association between telecommuting environment and low back pain among Japanese telecommuting workers: A cross-sectional study**

Ryutaro Matsugaki<sup>1</sup>, Ph.D., Keiji Muramatsu<sup>1</sup>, M.D., Ph.D., Seiichiro Tateishi<sup>2</sup>, M.D., Ph.D., Tomohisa Nagata<sup>3</sup>, M.D., Ph.D., Mayumi Tsuji<sup>4</sup>, M.D., Ph.D., Ayako Hino<sup>5</sup>, M.D., Ph.D., Kazunori Ikegami<sup>6</sup>, M.D., Ph.D., Yoshihisa Fujino<sup>7</sup>, M.D., M.P.H., Ph.D., and Shinya Matsuda<sup>1</sup>, M.D., Ph.D., for the CORoNaWork Project

**Author contributions:** R.M. wrote the manuscript; T.N., S.T., A.H., M.T., K.I., K.M., and S.M. reviewed the manuscript, provided advice on interpretation, and secured funding for research; Y.F. planned the overall survey, created the questionnaire, analyzed the data, and drafted the manuscript.

<sup>1</sup> Department of Preventive Medicine and Community Health, School of Medicine, University of Occupational and Environmental Health, Japan

<sup>2</sup> Department of Occupational Medicine, School of Medicine, University of Occupational and Environmental Health, Japan

<sup>3</sup> Department of Occupational Health Practice and Management, Institute of Industrial Ecological Sciences, University of Occupational and Environmental Health, Japan

<sup>4</sup> Department of Environmental Health, School of Medicine, University of Occupational and Environmental Health, Japan

<sup>5</sup> Department of Mental Health, Institute of Industrial Ecological Sciences, University of Occupational and Environmental Health, Japan

**NOTE:** This preprint reports new research that has not been certified by peer review and should not be used to guide clinical practice.

<sup>6</sup> Department of Work Systems and Health, Institute of Industrial Ecological Sciences,  
University of Occupational and Environmental Health, Japan

<sup>7</sup> Department of Environmental Epidemiology, Institute of Industrial Ecological Sciences,  
University of Occupational and Environmental Health, Japan

**Corresponding author:**

**Yoshihisa Fujino, M.D., M.P.H., Ph.D.**

Department of Environmental Epidemiology, Institute of Industrial Ecological Sciences,  
University of Occupational and Environmental Health, Japan

1-1, Iseigaoka, Yahatanishiku, Kitakyushu, 807-8555, Japan

Tel: +81-93-691-7401

Email: [zenq@med.uoeh-u.ac.jp](mailto:zenq@med.uoeh-u.ac.jp)

**Acknowledgements**

This study was supported and partly funded by the research grant from the University of Occupational and Environmental Health, Japan (no grant number); Japanese Ministry of Health, Labour and Welfare (H30-josei-ippan-002, H30-roudou-ippan-007, 19JA1004, 20JA1006, 210301-1, and 20HB1004); Anshin Zaidan (no grant number), the Collabo-Health Study Group (no grant number), and Hitachi Systems, Ltd. (no grant number) and scholarship donations from Chugai Pharmaceutical Co., Ltd. (no grant number)

The current members of the CORoNaWork Project, in alphabetical order, are as follows: Dr. Yoshihisa Fujino (present chairperson of the study group), Dr. Akira Ogami, Dr. Arisa Harada, Dr. Ayako Hino, Dr. Hajime Ando, Dr. Hisashi Eguchi, Dr. Kazunori Ikegami, Dr. Kei Tokutsu, Dr. Keiji Muramatsu, Dr. Koji Mori, Dr. Kosuke Mafune, Dr. Kyoko Kitagawa, Dr. Masako Nagata, Dr. Mayumi Tsuji, Ms. Ning Liu, Dr. Rie Tanaka, Dr. Ryutaro Matsugaki, Dr. Seiichiro Tateishi, Dr. Shinya Matsuda, Dr. Tomohiro Ishimaru, and Dr. Tomohisa Nagata. All members are affiliated with the University of Occupational and Environmental Health, Japan.

### **Disclosure**

Approval of the research protocol: This study was approved by the Ethics Committee of the University of Occupational and Environmental Health, Japan. (reference No. R2-079)

Informed consent: Informed consent was obtained from all the participants in the form of the website.

### **Conflict of interest**

The authors declare no conflict of interests for this article.

**Running head title:** Association between low back pain and telecommuting environment

1    **Association between telecommuting environment and low back pain among**

2    **Japanese telecommuting workers: A cross-sectional study**

3

4    **Abstract**

5    **Objectives:** We evaluated the relationship between telecommuting environment and  
6    low back pain (LBP) among desk-based workers in Japan.

7    **Methods:** This cross-sectional study included 3,663 desk-based, telecommuting  
8    workers. LBP was assessed using a 0–10 numerical rating scale. The telecommuting  
9    environment was evaluated using subjective questions. Mixed-effects logistic regression  
10    analysis was used to evaluate this association.

11    **Results:** The results of mixed-effects logistic model revealed that not having a place or  
12    room to concentrate on work, desk not well-lit enough for work, lack of space on the  
13    desk to work, not having enough legroom, and uncomfortable temperature and humidity  
14    conditions in the workspace were significantly associated with higher odds of LBP.

15    **Conclusions:** Our findings suggest that telecommuting environment is associated with  
16    the prevalence of LBP.

17

18    **Keywords:** Low Back Pain, Telecommuting, Workplace, COVID-19, Japan

## 19 **Introduction**

20           The coronavirus disease (COVID-19) pandemic has led to a rapid expansion of  
21 telecommuting in Japan. Moreover, the Japanese government has recommended  
22 telecommuting to prevent the spread of COVID-19<sup>1,2</sup>. Although the telecommuting rate  
23 among Japanese workers was 14.8% as of October 2019, it increased to 23.0% by  
24 November 2020<sup>3</sup>. In actuality, 85.0% of workers who were teleworking as of November  
25 2020 did so to prevent the spread of COVID-19<sup>3</sup>. Telecommuting is a way to continue  
26 business even during times of emergencies, and it may even become a more common  
27 way of working.

28           With the rapid expansion of telecommuting due to the COVID-19 pandemic,  
29 management of the work environment while telecommuting is an emerging  
30 occupational health problem. As with the office environment, the recommended  
31 working environment for a telecommuting worker is a private, quiet, and safe dedicated  
32 space, with adequate lighting, comfortable temperature and humidity, ergonomic  
33 chairs/desk<sup>4-6</sup>. However, it is difficult to manage the telecommuting work environment  
34 because, in contrast to the office, the workstation at home is difficult to supervise by  
35 managers, and managers lack the authority to direct the private environment of an  
36 individual. In addition, neither companies nor workers were sufficiently prepared to

37 optimize a telecommuting environment due to the unexpected occurrence of  
38 COVID-19<sup>4</sup>. It has been reported that more than 50% of telecommuting workers in  
39 Japan lack a desk/chair and more than 70% lack a private room or space for work<sup>3</sup>.

40 Low back pain (LBP) is an important health problem associated with office  
41 work. The prevalence of LBP is 34-56% among office workers<sup>7-10</sup>. In office workers,  
42 gender, body mass index, sleep disturbance, and previous symptoms of LBP are known  
43 to be risk factors for LBP<sup>8,10-13</sup>. In terms of work-related factors, sitting time and sitting  
44 posture at work are known risk factors for LBP among office workers<sup>8,14,15</sup>. At home,  
45 the work environment is less developed than that in the office environment; therefore,  
46 the work environment of home workers is assumed to be an important risk factor for  
47 LBP. Working in a space that is unsuitable for work can induce the worker to take  
48 awkward postures, which may have a negative impact on the musculoskeletal system.

49 Previous studies conducted during the COVID-19 pandemic have suggested an  
50 association between telecommuting and musculoskeletal pain<sup>16</sup>. However, the  
51 relationship between work environment and LBP in telecommuting workers remains  
52 unclear. Thus, the purpose of this study was to clarify the relationship between the work  
53 environment and LBP in telecommuting workers.

54

## 55 **Methods**

### 56 **Study Design and Subjects**

57           This cross-sectional Internet-based monitoring survey was conducted from  
58 December 22 to December 26, 2020, when the third wave of COVID-19 began in Japan.  
59 The details of the survey protocol have been previously reported<sup>17</sup>. Data were collected  
60 from workers with employment contracts at the time of the survey. Among 33,302  
61 workers, 27,036 were surveyed, excluding those who gave fraudulent answers. Among  
62 those surveyed, 3,663 (2,093 males and 1,570 females) workers, who responded that they  
63 mainly performed desk work (e.g., office work, computer work) and telecommuted at  
64 least once a week, were included in the present analysis.

65           This study conformed to the principles of the Declaration of Helsinki. In addition,  
66 the study was approved by the ethics committee of the University of Occupational and  
67 Environmental Health, Japan (reference no. R2-079). Informed consent was obtained  
68 online from the participants through the website.

69

### 70 **Assessment of LBP**

71           We assessed the presence of LBP in the participants based on two questions. First,  
72 we asked all subjects "Have you experienced stiff shoulders or LBP in the past two

73 weeks?" and asked them to answer, "yes" or "no." If the subject answered "yes" to that  
74 question, then the following questions were asked to assess the severity of LBP, such as  
75 "what was your average level of LBP in the past 2 weeks? (Please rate your pain from 0 to  
76 10, where 0=no pain at all and 10=the most intense pain you have experienced)." The  
77 numerical rating scale (NRS) was used for evaluating pain severity. In this study, a score  
78 of 3 or higher on the NRS indicated the presence of LBP, similar to previous studies<sup>18,19</sup>.

79

#### 80 **Assessment of the telecommuting environment**

81 The telecommuting environment was assessed using the following questions: 1)  
82 "Is your desk well-lit enough for you to work?"; 2) "Is there enough space to stretch the  
83 legs?"; 3) "Do you have a place or room where you can concentrate on your work?"; 4)  
84 "Are the degrees of temperature and humidity in the room where you work appropriate  
85 for working comfortably?"; 5) "Do you have enough space on your desk to work?"; 6)  
86 "Do you use an office desk or chair (including children's study desks)?" The respondents  
87 answered either "yes" or "no." These items were designed according to the guidelines  
88 for the promotion of appropriate introduction and implementation of telework by the  
89 Ministry of Health, Labour and Welfare<sup>6</sup>.

90

91 **Assessment of participants' characteristics and other covariates**

92 The following socioeconomic factors were examined: age, sex, body mass index  
93 (calculated by dividing the weight by height squared), educational background (junior  
94 high school, high school, vocational school, junior college or technical college, university,  
95 or graduate school), and equivalent income (household income divided by the square root  
96 of the household size).

97 The following lifestyle factors were examined: smoking (currently smoking),  
98 drinking (alcohol consumption on two or more days per week), physical activity (perform  
99 equivalent physical activities for at least 1 h a day in daily life for more than 2 days a  
100 week), and exercise habit (exercise for 30 minutes or more for more than two days a  
101 week).

102 Mental health status was assessed using the following question: "During the past  
103 30 days, for how many days did you experience poor mental health, including stress,  
104 depression, emotional problems, etc.?" This item is part of the Centers for Disease  
105 Control and Prevention core healthy day measures assessing health-related quality of life  
106 (CDC HRQOL-4)<sup>20</sup>. The Japanese version of CDC HRQOL-4 has been validated<sup>21</sup>.

107 The following work-related factors were examined: work duration (hours per  
108 week), frequency of telecommuting (one day per week, more than two days per week, and

109 more than four days per week), and company size (total number of employees at the  
110 company where the respondent works).

111

## 112 **Statistical analysis**

113 Age, body mass index, and number of days the participant experienced poor  
114 mental health during the past 30 days were expressed as continuous variables, and data  
115 are presented as mean and standard deviation. Other variables were expressed as  
116 categorical variables and presented as numbers and percentages.

117 Mixed-effects logistic regression analysis was conducted with LBP as the  
118 dependent variable, subjective evaluation of the telecommuting environment as the  
119 independent variable, and the city of residence as the random effects. We used age, sex,  
120 body mass index, lifestyle habits, number of days of poor mental health, equivalent  
121 income, educational background, working time, frequency of telecommuting, and  
122 company size as covariates to adjust for potential confounders.

123 All statistical analyses were performed using Stata software (Stata Statistical  
124 Software: Release 16; StataCorp LLC, TX, USA). A p-value of  $<0.05$  was considered  
125 statistically significant.

126

127 **Results**

128 Table 1 presents the characteristics of the participants. The prevalence rate of  
129 LBP in the study participants was 49.9%. Compared to the participants without LBP,  
130 those who experienced LBP were younger, middle-aged workers (20–49 years: 43.1% vs.  
131 52.2%), and predominantly females (37.6% vs. 48.2%).

132 Table 2 shows the telecommuting environment of the participants. The  
133 proportion of participants who answered "no" to each question regarding their  
134 telecommuting environment was higher among participants with LBP than among those  
135 without LBP.

136 The association between LBP and the telecommuting environment is shown in  
137 Table 3. There was a significant association between LBP and the following questions:  
138 "Is your desk well-lit enough for you to work? (No)" (odds ratio [OR]: 1.43, 95%  
139 confidence interval [CI]: 1.18–1.73,  $p < 0.001$ ), "Is there enough space to stretch the legs?  
140 (No)" (OR: 1.30, 95% CI: 1.10–1.54,  $p = 0.003$ ), "Do you have a place or room where you  
141 can concentrate on your work? (No)" (OR: 1.38, 95% CI: 1.17–1.63,  $p < 0.001$ ), "Are the  
142 degrees of temperature and humidity in the room where you work appropriate for  
143 working comfortably? (No)" (OR: 1.32, 95% CI: 1.13–1.56,  $p = 0.001$ ), and "Do you have  
144 enough space on your desk to work? (No)" (OR: 1.19, 95% CI: 1.02–1.39,  $p = 0.024$ ).

145 There was no significant association between LBP and the question "Do you use an office  
146 desk or chair? (No)" (OR: 1.03, 95% CI: 0.90–1.18, p=0.696). Similar results were  
147 obtained for Model 1, which was adjusted only for sex and age, and for Model 2, which  
148 was adjusted for other potential confounders.  
149

150 **Discussion**

151           This study showed that telecommuting environment was associated with LBP  
152 in home workers during the COVID-19 pandemic. Particularly, it was suggested that  
153 insufficient desk and foot space, inadequate desk lighting, uncomfortable room  
154 temperature and humidity, and lack of room/space for concentrating on work were  
155 associated with the prevalence of LBP.

156           In this study, workspace-related factors (e.g., room brightness, temperature,  
157 and humidity) had a stronger impact on LBP than the environment around the desk  
158 being used (e.g., desk, chair, foot space). Because brightness and temperature/humidity  
159 are properly controlled in a typical office, attention tends to be focused on the  
160 environment around the desk (e.g., desk, chair, etc.), when considering LBP and the  
161 work environment of desk workers. However, in the case of telecommuting, control of  
162 brightness, temperature, and humidity is left to the worker and may not be properly  
163 managed. The results of this study suggest the importance of paying attention to the  
164 entire workspace when considering LBP prevention among telecommuters.

165           In this study, inadequate desk and foot space, and insufficient lighting were  
166 associated with LBP. It is suggested that an awkward posture and sitting for long  
167 durations are risk factors for LBP<sup>8,22-24</sup>. Having enough space on the desk and for the

168 feet is effective in maintaining good posture when working as well as changing the  
169 posture and stretching as needed. In addition, inadequate lighting at the desk may  
170 contribute to awkward postures among workers when looking at documents or computer  
171 screens on their desk. It is necessary to manage the work environment to avoid awkward  
172 postures and prolonged maintenance of the same posture during work.

173           The present study also revealed that uncomfortable temperature and humidity  
174 in the telecommuting space was associated with LBP. Because this study was conducted  
175 during the winter season, it can be speculated that the results imply that cold  
176 temperature and low humidity are associated with LBP. The relationship between cold  
177 temperature and LBP has been shown in previous studies<sup>15,25-27</sup>, which is the same for  
178 telecommuting workers. Although the most suitable room temperature for the  
179 prevention of LBP is not clear, we consider that room temperatures that are subjectively  
180 cold should be avoided, as they may increase the risk of musculoskeletal symptoms and  
181 injuries.

182           In this study, using an office chair/desk was not associated with LBP. This  
183 finding is supported by those of previous studies reporting no significant association  
184 between LBP and use of chair/desk in office workers<sup>11,28</sup>. Alternatively, previous  
185 studies have reported that LBP is related to the characteristics of the chair, such as with

186 or without lumbar support and adjustable back support<sup>8,22</sup>. This may suggest that it is  
187 not only a matter of whether an office chair is used but also what function and shape of  
188 the chair is used for the prevention of LBP.

189           The lack of room or space to concentrate on work was associated with LBP. It  
190 is suggested that the teleworker's workstation should be in a dedicated space that is  
191 private, quiet, and secure, preferably away from the flow of activity in the home<sup>4</sup>. The  
192 results of this study support that argument. Previous studies have reported that  
193 psychological stress is associated with LBP in workers<sup>29-31</sup>. Lack of a room or space to  
194 concentrate on work may cause psychological stress to telecommuting workers. The  
195 results of this study suggest that it is important for telecommuting workers to have a  
196 space where they can devote themselves to their work as much as possible, despite  
197 working from home.

198           Based on these findings, we suggest that the work environment of  
199 telecommuting workers may be associated with LBP. Therefore, employers should  
200 educate telecommuting workers about the importance of an appropriate home working  
201 environment. If it is difficult to prepare an appropriate telecommuting environment due  
202 to household situations and family structure, then it is necessary to consider the use of

203 co-working spaces, satellite offices, and spaces near the employee's residence for  
204 telecommuting.

205           This study has three limitations. First, specific details such as history, symptom  
206 duration, and LBP diagnosis are unknown, as only the NRS was used for evaluation.  
207 However, it is uncertain how these factors affect the relationship between the  
208 telecommuting environment and LBP. Second, home environment, lifestyle factors, and  
209 working condition were also evaluated using subjective questions; hence, the validity of  
210 the responses is unclear. However, an objective method to evaluate the work  
211 environment at home has not been established at this time. Third, selection bias may  
212 have occurred in this study. People with LBP may be more likely to choose  
213 telecommuting if possible. However, the effect of this bias on the results of this study is  
214 uncertain.

215

## 216 **Conclusion**

217           The present study suggests that telecommuting environment is associated with  
218 the prevalence of LBP among telecommuting workers in Japan, indicating that  
219 employers may need to educate their employees to maintain a healthy and ergonomic  
220 environment.

## 221   **References**

- 222    1.    Decisions by the Headquarters for Novel Coronavirus Disease Control. Basic  
223        Policies for Novel Coronavirus Disease Control. Ministry of Health, Labour and  
224        Welfare. Published 2020. Accessed June 9, 2021.  
225        <https://www.mhlw.go.jp/content/10200000/000603610.pdf>
- 226    2.    Decisions by the Headquarters for Novel Coronavirus Disease Control. Basic  
227        Policies for Novel Coronavirus Disease Control (Revised on April 7, 2020).  
228        Ministry of Health, Labour and Welfare. Published 2020. Accessed June 9, 2021.  
229        <https://www.mhlw.go.jp/content/10900000/000620733.pdf>
- 230    3.    Vital statistics of telework (in Japanese). Ministry of Land, Infrastructure,  
231        Transport and Tourism. Published 2021. Accessed June 8, 2021.  
232        <https://www.mlit.go.jp/toshi/daisei/content/001392107.pdf>
- 233    4.    Robertson MM, Mosier K. Work from home: Human factors/ergonomics  
234        considerations for teleworking. International Labour Organization. Published  
235        2020. Accessed May 31, 2021.  
236        <http://www.ilo.org/global/topics/safety-and-health-at-work/events-training/events>  
237        -[meetings/world-day-safety-health-at-work/WCMS\\_742061/lang--en/index.htm](http://www.ilo.org/global/topics/safety-and-health-at-work/events-training/events)

- 238 5. Work environment maintenance for teleworking at home (in Japanese). Ministry  
239 of Health, Labour and Welfare. Published 2020. Accessed June 9, 2021.  
240 [https://www.mhlw.go.jp/stf/newpage\\_01603.html](https://www.mhlw.go.jp/stf/newpage_01603.html)
- 241 6. Guidelines for the Promotion of Appropriate Introduction and Implementation of  
242 Telework (in Japanese). Ministry of Health, Labour and Welfare. Published 2021.  
243 Accessed June 9, 2021.  
244 [https://www.mhlw.go.jp/stf/seisakunitsuite/bunya/koyou\\_roudou/roudoukijun/shi](https://www.mhlw.go.jp/stf/seisakunitsuite/bunya/koyou_roudou/roudoukijun/shi)  
245 [goto/guideline.html](https://www.mhlw.go.jp/stf/seisakunitsuite/bunya/koyou_roudou/roudoukijun/shi)
- 246 7. Janwantanakul P, Pensri P, Jiamjarasrangsri V, Sinsongsook T. Prevalence of  
247 self-reported musculoskeletal symptoms among office workers. *Occup Med*  
248 *(Chic Ill)*. 2008;58(6):436-438. doi:10.1093/occmed/kqn072
- 249 8. Spyropoulos P, Papathanasiou G, Georgoudis G, Chronopoulos E, Koutis H,  
250 Koumoutsou F. Prevalence of low back pain in Greek public office workers. *Pain*  
251 *Physician*. 2007;10(5):651-659. Accessed May 12, 2021.  
252 <https://pubmed.ncbi.nlm.nih.gov/17876361/>
- 253 9. Fanta M, Alagaw A, Kejela G, Tunje A. Low back pain and associated factors  
254 among civil service sectors office workers in Southern Ethiopia. *Int J Occup Saf*  
255 *Heal*. 2020;10(1):53-63. doi:10.3126/ijosh.v10i1.29883

- 256 10. Kaliniene G, Ustinaviciene R, Skemiene L, Vaiciulis V, Vasilavicius P.  
257 Associations between musculoskeletal pain and work-related factors among  
258 public service sector computer workers in Kaunas County, Lithuania. *BMC*  
259 *Musculoskelet Disord.* 2016;17(1):1-12. doi:10.1186/s12891-016-1281-7
- 260 11. Juul-Kristensen B, Søgaard K, Strøyer J, Jensen C. Computer users' risk factors  
261 for developing shoulder, elbow and back symptoms. *Scand J Work Environ Heal.*  
262 2004;30(5):390-398. doi:10.5271/sjweh.827
- 263 12. Janwantanakul P, Sitthipornvorakul E, Paksaichol A. Risk factors for the onset of  
264 nonspecific low back pain in office workers: A systematic review of prospective  
265 cohort studies. *J Manipulative Physiol Ther.* 2012;35(7):568-577.  
266 doi:10.1016/j.jmpt.2012.07.008
- 267 13. Shariat A, Cardoso JR, Cleland JA, et al. Prevalence rate of neck, shoulder and  
268 lower back pain in association with age, body mass index and gender among  
269 Malaysian office workers. *Work.* 2018;60(2):1-9. doi:10.3233/wor-2738
- 270 14. Janwantanakul P, Pensri P, Moolkay P, Jiamjarasrangi W. Development of a  
271 risk score for low back pain in office workers -a cross-sectional study. *BMC*  
272 *Musculoskelet Disord.* 2011;12(1):23. doi:10.1186/1471-2474-12-23

- 273 15. Ye S, Jing Q, Wei C, Lu J. Risk factors of non-specific neck pain and low back  
274 pain in computer-using office workers in China: A cross-sectional study. *BMJ*  
275 *Open*. 2017;7(4):e014914. doi:10.1136/bmjopen-2016-014914
- 276 16. Yoshimoto T, Fujii T, Oka H, Kasahara S, Kawamata K, Matsudaira K. Pain  
277 status and its association with physical activity, psychological stress, and  
278 telework among Japanese workers with pain during the COVID-19 pandemic. *Int*  
279 *J Environ Res Public Health*. 2021;18(11):5595. doi:10.3390/ijerph18115595
- 280 17. Fujino Y, Ishimaru T, Eguchi H, et al. Protocol for a nationwide Internet-based  
281 health survey in workers during the COVID-19 pandemic in 2020. *medRxiv*.  
282 2021. doi:<https://doi.org/10.1101/2021.02.02.21249309>
- 283 18. Collins SL, Moore RA, McQuay HJ. The visual analogue pain intensity scale:  
284 what is moderate pain in millimetres? *Pain*. 1997;72(1-2):95-97.  
285 doi:10.1016/S0304-3959(97)00005-5
- 286 19. Makino T, Kaito T, Kashi M, Iwasaki M, Yoshikawa H. Low back pain and  
287 patient-reported QOL outcomes in patients with adolescent idiopathic scoliosis  
288 without corrective surgery. *Springerplus*. 2015;4(1):397.  
289 doi:10.1186/S40064-015-1189-Y

- 290 20. Health-Related Quality of LIFE (HRQOL). Centers for Disease Control and  
291 Prevention (CDC). Published 2018. Accessed September 3, 2021.  
292 <https://www.cdc.gov/hrqol/methods.htm>
- 293 21. Chimed-Ochir O, Mine Y, Okawara M, Ibayashi K, Miyake F, Fujino Y.  
294 Validation of the Japanese version of the CDC HRQOL-4 in workers. *J Occup*  
295 *Health*. 2020;62(1):12152. doi:10.1002/1348-9585.12152
- 296 22. Janwantanakul P, Pensri P, Moolkay P, Jiamjarasrangsi W. *Development of a*  
297 *Risk Score for Low Back Pain in Office Workers - a Cross-Sectional Study*. Vol  
298 12.; 2011. doi:10.1186/1471-2474-12-23
- 299 23. Liira JP, Shannon HS, Chambers LW, Haines TA. Long-term back problems and  
300 physical work exposures in the 1990 Ontario health survey. *Am J Public Health*.  
301 1996;86(3):382-387. doi:10.2105/AJPH.86.3.382
- 302 24. Lis AM, Black KM, Korn H, Nordin M. Association between sitting and  
303 occupational LBP. *Eur Spine J*. 2007;16(2):283-298.  
304 doi:10.1007/s00586-006-0143-7
- 305 25. Jin K, Sorock GS, Courtney T, et al. Risk factors for work-related low back pain  
306 in the People's Republic of China. *Int J Occup Environ Health*. 2000;6(1):26-33.  
307 doi:10.1179/oeh.2000.6.1.26

- 308 26. Dovrat E, Katz-Leurer M. Cold exposure and low back pain in store workers in  
309 Israel. *Am J Ind Med.* 2007;50(8):626-631. doi:10.1002/ajim.20488
- 310 27. Skandfer M, Talykova L, Brenn T, Nilsson T, Vakt skjold A. Low back pain  
311 among mineworkers in relation to driving, cold environment and ergonomics.  
312 *Ergonomics.* 2014;57(10):1541-1548. doi:10.1080/00140139.2014.904005
- 313 28. Celik S, Celik K, Dirimese E, Tasdemir N, Arik T, Büyükkara İb. Determination  
314 of pain in musculoskeletal system reported by office workers and the pain risk  
315 factors. *Int J Occup Med Environ Health.* 2018;31(1):91-111.  
316 doi:10.13075/ijomeh.1896.00901
- 317 29. Vinstrup J, Jakobsen MD, Andersen LL. Perceived stress and low-back pain  
318 among healthcare workers: A multi-center prospective cohort study. *Front Public*  
319 *Heal.* 2020;8:297. doi:10.3389/fpubh.2020.00297
- 320 30. Tsuboi Y, Ueda Y, Naruse F, Ono R. The association between perceived stress  
321 and low back pain among eldercare workers in Japan. *J Occup Environ Med.*  
322 2017;59(8):765-767. doi:10.1097/JOM.0000000000001062
- 323 31. Yoshimoto T, Oka H, Katsuhira J, et al. Prognostic psychosocial factors for  
324 disabling low back pain in Japanese hospital workers. *PLoS One.*  
325 2017;12(5):e0177908. doi:10.1371/journal.pone.0177908

326

327 1. Decisions by the Headquarters for Novel Coronavirus Disease Control. Basic

328 Policies for Novel Coronavirus Disease Control. Ministry of Health, Labour and

329 Welfare. Published 2020. Accessed June 9, 2021.

330 <https://www.mhlw.go.jp/content/10200000/000603610.pdf>

331 2. Decisions by the Headquarters for Novel Coronavirus Disease Control. Basic

332 Policies for Novel Coronavirus Disease Control (Revised on April 7, 2020).

333 Ministry of Health, Labour and Welfare. Published 2020. Accessed June 9, 2021.

334 <https://www.mhlw.go.jp/content/10900000/000620733.pdf>

335 3. Vital statistics of telework (in Japanese). Ministry of Land, Infrastructure,

336 Transport and Tourism. Published 2021. Accessed June 8, 2021.

337 <https://www.mlit.go.jp/toshi/daisei/content/001392107.pdf>

338 4. Robertson MM, Mosier K. Work from home: Human factors/ergonomics

339 considerations for teleworking. International Labour Organization. Published

340 2020. Accessed May 31, 2021.

341 <http://www.ilo.org/global/topics/safety-and-health-at-work/events-training/events>

342 [-meetings/world-day-safety-health-at-work/WCMS\\_742061/lang--en/index.htm](http://www.ilo.org/global/topics/safety-and-health-at-work/events-training/events-meetings/world-day-safety-health-at-work/WCMS_742061/lang--en/index.htm)

- 343 5. Work environment maintenance for teleworking at home (in Japanese). Ministry  
344 of Health, Labour and Welfare. Published 2020. Accessed June 9, 2021.  
345 [https://www.mhlw.go.jp/stf/newpage\\_01603.html](https://www.mhlw.go.jp/stf/newpage_01603.html)
- 346 6. Guidelines for the Promotion of Appropriate Introduction and Implementation of  
347 Telework (in Japanese). Ministry of Health, Labour and Welfare. Published 2021.  
348 Accessed June 9, 2021.  
349 [https://www.mhlw.go.jp/stf/seisakunitsuite/bunya/koyou\\_roudou/roudoukijun/shi](https://www.mhlw.go.jp/stf/seisakunitsuite/bunya/koyou_roudou/roudoukijun/shi)  
350 [goto/guideline.html](https://www.mhlw.go.jp/stf/seisakunitsuite/bunya/koyou_roudou/roudoukijun/shi)
- 351 7. Janwantanakul P, Pensri P, Jiamjarasrangsri V, Sinsongsook T. Prevalence of  
352 self-reported musculoskeletal symptoms among office workers. *Occup Med*  
353 *(Chic Ill)*. 2008;58(6):436-438. doi:10.1093/occmed/kqn072
- 354 8. Spyropoulos P, Papathanasiou G, Georgoudis G, Chronopoulos E, Koutis H,  
355 Koumoutsou F. Prevalence of low back pain in greek public office workers. *Pain*  
356 *Physician*. 2007;10(5):651-659. Accessed May 12, 2021.  
357 <https://pubmed.ncbi.nlm.nih.gov/17876361/>
- 358 9. Fanta M, Alagaw A, Kejela G, Tunje A. Low back pain and associated factors  
359 among civil service sectors office workers in Southern Ethiopia. *Int J Occup Saf*  
360 *Heal*. 2020;10(1):53-63. doi:10.3126/ijosh.v10i1.29883

- 361 10. Kaliniene G, Ustinaviciene R, Skemiene L, Vaiciulis V, Vasilavicius P.  
362 Associations between musculoskeletal pain and work-related factors among  
363 public service sector computer workers in Kaunas County, Lithuania. *BMC*  
364 *Musculoskelet Disord.* 2016;17(1):1-12. doi:10.1186/s12891-016-1281-7
- 365 11. Juul-Kristensen B, Søgaard K, Strøyer J, Jensen C. Computer users' risk factors  
366 for developing shoulder, elbow and back symptoms. *Scand J Work Environ Heal.*  
367 2004;30(5):390-398. doi:10.5271/sjweh.827
- 368 12. Janwantanakul P, Sitthipornvorakul E, Paksaichol A. Risk factors for the onset of  
369 nonspecific low back pain in office workers: A systematic review of prospective  
370 cohort studies. *J Manipulative Physiol Ther.* 2012;35(7):568-577.  
371 doi:10.1016/j.jmpt.2012.07.008
- 372 13. Shariat A, Cardoso JR, Cleland JA, et al. Prevalence rate of neck, shoulder and  
373 lower back pain in association with age, body mass index and gender among  
374 Malaysian office workers. *Work.* 2018;60(2):1-9. doi:10.3233/wor-2738
- 375 14. Janwantanakul P, Pensri P, Moolkay P, Jiamjarasrangi W. Development of a  
376 risk score for low back pain in office workers -a cross-sectional study. *BMC*  
377 *Musculoskelet Disord.* 2011;12(1):23. doi:10.1186/1471-2474-12-23

- 378 15. Ye S, Jing Q, Wei C, Lu J. Risk factors of non-specific neck pain and low back  
379 pain in computer-using office workers in China: A cross-sectional study. *BMJ*  
380 *Open*. 2017;7(4). doi:10.1136/bmjopen-2016-014914
- 381 16. Yoshimoto T, Fujii T, Oka H, Kasahara S, Kawamata K, Matsudaira K. Pain  
382 Status and Its Association with Physical Activity, Psychological Stress, and  
383 Telework among Japanese Workers with Pain during the COVID-19 Pandemic.  
384 *Int J Environ Res Public Health*. 2021;18(11):5595. doi:10.3390/ijerph18115595
- 385 17. Fujino Y, Ishimaru T, Eguchi H, et al. Protocol for a nationwide Internet-based  
386 health survey in workers during the COVID-19 pandemic in 2020. *medRxiv*.  
387 Published online 2021. doi:<https://doi.org/10.1101/2021.02.02.21249309>
- 388 18. SL C, RA M, HJ M. The visual analogue pain intensity scale: what is moderate  
389 pain in millimetres? *Pain*. 1997;72(1-2):95-97.  
390 doi:10.1016/S0304-3959(97)00005-5
- 391 19. T M, T K, M K, M I, H Y. Low back pain and patient-reported QOL outcomes in  
392 patients with adolescent idiopathic scoliosis without corrective surgery.  
393 *Springerplus*. 2015;4(1). doi:10.1186/S40064-015-1189-Y

- 394 20. Health-Related Quality of LIFE (HRQOL). Centers for Disease Control and  
395 Prevention (CDC). Published 2018. Accessed September 3, 2021.  
396 <https://www.cdc.gov/hrqol/methods.htm>
- 397 21. Chimed-Ochir O, Mine Y, Okawara M, Ibayashi K, Miyake F, Fujino Y.  
398 Validation of the Japanese version of the CDC HRQOL-4 in workers. *J Occup*  
399 *Health*. 2020;62(1):12152. doi:10.1002/1348-9585.12152
- 400 22. Janwantanakul P, Pensri P, Moolkay P, Jiamjarasrangsi W. *Development of a*  
401 *Risk Score for Low Back Pain in Office Workers - a Cross-Sectional Study*. Vol  
402 12.; 2011. doi:10.1186/1471-2474-12-23
- 403 23. Liira JP, Shannon HS, Chambers LW, Haines TA. Long-term back problems and  
404 physical work exposures in the 1990 Ontario health survey. *Am J Public Health*.  
405 1996;86(3):382-387. doi:10.2105/AJPH.86.3.382
- 406 24. Lis AM, Black KM, Korn H, Nordin M. Association between sitting and  
407 occupational LBP. *Eur Spine J*. 2007;16(2):283-298.  
408 doi:10.1007/s00586-006-0143-7
- 409 25. Jin K, Sorock GS, Courtney T, et al. Risk factors for work-related low back pain  
410 in the People's Republic of China. *Int J Occup Environ Health*. 2000;6(1):26-33.  
411 doi:10.1179/oeh.2000.6.1.26

- 412 26. Dovrat E, Katz-Leurer M. Cold exposure and low back pain in store workers in  
413 Israel. *Am J Ind Med.* 2007;50(8):626-631. doi:10.1002/ajim.20488
- 414 27. Skandfer M, Talykova L, Brenn T, Nilsson T, Vakt skjold A. Low back pain  
415 among mineworkers in relation to driving, cold environment and ergonomics.  
416 *Ergonomics.* 2014;57(10):1541-1548. doi:10.1080/00140139.2014.904005
- 417 28. Celik S, Celik K, Dirimese E, Tasdemir N, Arik T, Büyükkara İb. Determination  
418 of pain in musculoskeletal system reported by office workers and the pain risk  
419 factors. *Int J Occup Med Environ Health.* 2018;31(1):91-111.  
420 doi:10.13075/ijomeh.1896.00901
- 421 29. Vinstrup J, Jakobsen MD, Andersen LL. Perceived Stress and Low-Back Pain  
422 Among Healthcare Workers: A Multi-Center Prospective Cohort Study. *Front*  
423 *Public Heal.* 2020;8. doi:10.3389/fpubh.2020.00297
- 424 30. Tsuboi Y, Ueda Y, Naruse F, Ono R. The Association between Perceived Stress  
425 and Low Back Pain among Eldercare Workers in Japan. *J Occup Environ Med.*  
426 2017;59(8):765-767. doi:10.1097/JOM.0000000000001062
- 427 31. Yoshimoto T, Oka H, Katsuhira J, et al. Prognostic psychosocial factors for  
428 disabling low back pain in Japanese hospital workers. *PLoS One.* 2017;12(5).  
429 doi:10.1371/journal.pone.0177908



Table 1. Characteristics of participants

|                                                             | without low back pain | with low back pain |
|-------------------------------------------------------------|-----------------------|--------------------|
|                                                             | (n=1834)              | (n=1829)           |
|                                                             | n (%) or mean (SD)    | n (%) or mean (SD) |
| Age (y)                                                     | 49.5 (10.2)           | 82 (4.5%)          |
| Sex (Men)                                                   | 1145 (62.4%)          | 948 (51.8%)        |
| Body mass index                                             | 22.4 (3.6)            | 22.4 (3.8)         |
| Educational background                                      |                       |                    |
| Junior high school                                          | 15 (0.8%)             | 14 (0.8%)          |
| High school                                                 | 268 (14.6%)           | 262 (14.3%)        |
| Vocational school                                           | 160 (8.7%)            | 173 (9.5%)         |
| Junior college/technical college                            | 157 (8.6%)            | 189 (10.3%)        |
| University                                                  | 1030 (56.2%)          | 1014 (55.4%)       |
| Graduate school                                             | 204 (11.1%)           | 177 (9.7%)         |
| Equivalent income (10,000yen)                               |                       |                    |
| <260                                                        | 517 (28.2%)           | 485 (26.5%)        |
| 261-450                                                     | 458 (25.0%)           | 507 (27.7%)        |
| 451-600                                                     | 374 (20.4%)           | 393 (21.5%)        |
| >601                                                        | 485 (26.4%)           | 444 (24.3%)        |
| Lifestyle habit                                             |                       |                    |
| Smoking (yes)                                               | 447 (24.4%)           | 460 (25.2%)        |
| Drinking ( $\geq 2$ days/week)                              | 823 (44.9%)           | 855 (46.7%)        |
| Physical activity ( $\geq 2$ days/week)                     | 697 (38.0%)           | 685 (37.5%)        |
| Exercise habit ( $\geq 2$ days/week)                        | 531 (29.0%)           | 523 (28.6%)        |
| Days experienced poor mental health during the past 30 days | 2.3 (5.9)             | 5.1 (8.4)          |
| Working time (hour/week)                                    |                       |                    |
| <40                                                         | 1346 (73.4%)          | 1293 (70.7%)       |
| 40-48                                                       | 237 (12.9%)           | 245 (13.4%)        |
| 49-60                                                       | 189 (10.3%)           | 232 (12.7%)        |
| >60                                                         | 62 (3.4%)             | 59 (3.2%)          |
| Frequency of telecommute (days/week)                        |                       |                    |
| 1                                                           | 266 (14.5%)           | 297 (16.2%)        |
| 2-3                                                         | 495 (27.0%)           | 563 (30.8%)        |
| $\geq 4$                                                    | 1073 (58.5%)          | 969 (53.0%)        |
| Company size (person)                                       |                       |                    |
| $\leq 9$                                                    | 732 (39.9%)           | 614 (33.6%)        |
| 10-99                                                       | 202 (11.0%)           | 228 (12.5%)        |
| 100-999                                                     | 304 (16.6%)           | 370 (20.2%)        |
| >1000                                                       | 596 (32.5%)           | 617 (33.7%)        |

Table 2. Telecommuting environment of participants

|                                                                                                                  | without low back pain | with low back pain |
|------------------------------------------------------------------------------------------------------------------|-----------------------|--------------------|
|                                                                                                                  | (n=1834)              | (n=1829)           |
|                                                                                                                  | n (%)                 | n (%)              |
| Telecommuting environment                                                                                        |                       |                    |
| Is your desk well-lit for you to work? (No)                                                                      | 235 (12.8%)           | 361 (19.7%)        |
| Is there enough space to stretch the legs? (No)                                                                  | 334 (18.2%)           | 450 (24.6%)        |
| Do you have a place or room where you can concentrate on your work? (No)                                         | 351 (19.1%)           | 496 (27.1%)        |
| Are the degrees of temperature and humidity in the room where you work appropriate for working comfortably? (No) | 395 (21.5%)           | 526 (28.8%)        |
| Do you have enough space on your desk to work? (No)                                                              | 472 (25.7%)           | 582 (31.8%)        |
| Do you use an office desk or chair? (Including children's study desks) (No)                                      | 860 (46.9%)           | 931 (50.9%)        |

Table 3. The association between low back pain and telecommuting environment

|                                                                                                                  | Model 1 <sup>†</sup> |        |      | Model 2 <sup>‡</sup> |        |      |      |        |
|------------------------------------------------------------------------------------------------------------------|----------------------|--------|------|----------------------|--------|------|------|--------|
|                                                                                                                  | OR                   | 95% CI | P    | OR                   | 95% CI | P    |      |        |
| Telecommuting environment                                                                                        |                      |        |      |                      |        |      |      |        |
| Is your desk well-lit <b>enough</b> for you to work? (No)                                                        | 1.66                 | 1.38   | 1.99 | <0.001               | 1.43   | 1.18 | 1.73 | <0.001 |
| Is there enough space to stretch the legs? (No)                                                                  | 1.47                 | 1.25   | 1.73 | <0.001               | 1.30   | 1.10 | 1.54 | 0.003  |
| Do you have a place or room where you can concentrate on your work? (No)                                         | 1.53                 | 1.31   | 1.80 | <0.001               | 1.38   | 1.17 | 1.64 | <0.001 |
| Are the degrees of temperature and humidity in the room where you work appropriate for working comfortably? (No) | 1.45                 | 1.25   | 1.69 | <0.001               | 1.32   | 1.13 | 1.56 | 0.001  |
| Do you have enough space on your desk to work? (No)                                                              | 1.34                 | 1.16   | 1.55 | <0.001               | 1.19   | 1.02 | 1.39 | 0.024  |
| Do you use an office desk or chair? (Including children's study desks) (No)                                      | 1.11                 | 0.97   | 1.27 | 0.121                | 1.03   | 0.90 | 1.18 | 0.696  |

<sup>†</sup>Model 1 adjusted for age and sex

<sup>‡</sup>Model 2 adjusted for age, sex, body mass index, lifestyle habit (smoking, drinking, physical activity, and exercise habit), number of days the participants experienced poor mental health during the past 30 days, equivalent income, educational background, working time, frequency of telecommuting, and company size
